# Supplementary material for: A Structurally Characterized Organometallic Plutonium(IV) Complex
Source: PubMed Central journal article supplement (PMC5485009; doi:10.1002/anie.201701858), 2017-03-30
Supplement: ANIE-56-5066-s001.pdf [file ANIE-56-5066-s001.pdf]

## Supporting Information

### **A Structurally Characterized Organometallic Plutonium(IV) Complex**

*Christos Apostolidis, Olaf Walter,\* Jochen Vogt,\* Phil Liebing, Laurent Maron,\* and Frank T. Edelmann\**

anie\_201701858\_sm\_miscellaneous\_information.pdf

# Supporting Information

## Contents

|                                                                                                                                                                  | Page      |
|------------------------------------------------------------------------------------------------------------------------------------------------------------------|-----------|
| <b>Synthesis and spectroscopic characterization</b>                                                                                                              | <b>3</b>  |
| <b>Table S1.</b> $^1\text{H}$ NMR and $^{13}\text{C}$ NMR data for <b>4</b>                                                                                      | 4         |
| <b>Figure S1.</b> $^1\text{H}/^{13}\text{C}$ -HSQC spectrum (full)                                                                                               | 4         |
| <b>Figure S2.</b> Zoom into the aromatic region of the $^1\text{H}/^{13}\text{C}$ -HSQC spectrum and the $^1\text{H}$ -NMR spectrum                              | 5         |
| <b>Crystal structure report</b>                                                                                                                                  | <b>5</b>  |
| <b>Figure S3.</b> Molecular structure of the title compound in the crystal                                                                                       | 6         |
| <b>Table S2.</b> Crystallographic experimental details                                                                                                           | 7         |
| <b>Table S3.</b> Atomic coordinates and equivalent isotropic displacement parameters                                                                             | 8         |
| <b>Table S4.</b> Interatomic distances                                                                                                                           | 9         |
| <b>Table S5.</b> Selected Interatomic angles                                                                                                                     | 9         |
| <b>Table S6.</b> Anisotropic displacement parameters                                                                                                             | 10        |
| <b>Table S7.</b> Derived atomic coordinates and displacement parameters for hydrogen atoms                                                                       | 11        |
| <b>Computational study details</b>                                                                                                                               | <b>12</b> |
| <b>Table S8.</b> Structural parameters of plutonocene ( $\text{Pu}(\text{COT})_2$ )                                                                              | 13        |
| <b>Figure S4.</b> Structure of plutonocene ( $\text{Pu}(\text{COT})_2$ )                                                                                         | 13        |
| <b>Table S9.</b> Bond lengths from <i>ab initio</i> geometry optimizations in comparison with experimental data                                                  | 14        |
| <b>Figure S5.</b> Structure of $\text{Pu}(1,3\text{-COT}''')(1,4\text{-COT}''')$ ( <b>4</b> ) from MP2/LANL2DZ(d,p) geometry optimizations                       | 15        |
| <b>Figure S6a–d.</b> Molecule orbital diagrams of $\text{An}(1,3\text{-COT}''')(1,4\text{-COT}''')$ and $\text{An}(1,4\text{-COT}''')_2$ complexes (An = U, Pu). | 16        |
| <b>References</b>                                                                                                                                                | <b>20</b> |

## Synthesis and spectroscopic characterization

**General: *Caution!*** All Pu isotopes are radioactive.  $^{239}\text{Pu}$  is furthermore a fissile material and underlies therefore special control, regulations and restrictions. Actinides are in general  $\alpha$  emitters and therefore any contamination or incorporation has to be avoided for sure.

The manipulations with radionuclides were conducted in the radiochemical laboratories at the Joint Research Centre (JRC) – Karlsruhe, Germany. Unsealed transuranium compounds were manipulated in dinitrogen filled (99+%), negative-pressure radiological gloveboxes. The glovebox for preparative chemistry was fitted with an automated dual vacuum/argon manifold and standard Schlenk techniques were used. NMR spectra were recorded on the Bruker Ascent™ 400 MHz WB NMR/DNP spectrometer equipped with a Bruker Triple Resonance Broad Band Probe (TBI). Degassed fluoropolymer NMR tube liners (4 mm nominal O.D.; 140°C,  $6 \times 10^{-4}$  mbar, 12 h) were charged with the liquid samples ensuring that the outer surface remained free from contamination, and sealed. The sealed liner was then transferred into a standard borosilicate glass NMR tube placed in a PVC bag, which was sealed by welding. Chemical shifts were calibrated against residual protio solvent signal and are reported relative to tetramethylsilane ( $\delta = 0$  ppm).

Commercially available reagents and solvents were obtained from Sigma-Aldrich Co., ACROS Organics, STREM Chemicals Inc. or ABCR GmbH & Co. KG and used as received unless otherwise stated. Argon 6.0 N was supplied by basi Schöberl GmbH & Co. KG and purified with Agilent Technologies Big Moisture and Oxygen Traps to achieve sub-5 and sub-1 ppb levels of the corresponding impurities respectively. Anhydrous grade solvents were purified immediately before use by distillation from appropriate drying agents under argon.  $\text{PuCl}_3$  was on stock but might be prepared according to (1, 2).

**Compound:**  $[\text{Pu}\{\eta^8\text{-C}_8\text{H}_6\text{-1,3-(SiMe}_3)_2\}\{\eta^8\text{-C}_8\text{H}_6\text{-1,4-(SiMe}_3)_2\}]$  (**4**)

140 mg (0.56 mmol)  $\text{C}_8\text{H}_6\text{-1,4-(SiMe}_3)_2$  were dissolved in 5 ml THF. 0.8 ml of 1.6 molar *n*-BuLi (1.28 mmol) in hexanes are added at RT. The solution turns deep orange and warms up slightly. 97.2 mg (0.28 mmol)  $\text{PuCl}_3$  were added as a solid. The brown-green reaction mixture was stirred at r.t. for 7d. The solvent was removed and the residue was dissolved in 10 ml of toluene forming a green solution. Addition of 20 mg (0.15 mmol) water-free  $\text{CoCl}_2$  turned the reaction dark red. It was stirred at RT for 5h and refluxed for 15h to complete the



**Figure S2.** Zoom into the aromatic region of the  $^1\text{H}/^{13}\text{C}$ -HSQC spectrum (left) and the  $^1\text{H}$ -NMR spectrum (right). The CH correlated signal of the weak because very broad resonance at 9.78 ppm assigned to the proton in 2-position of 1,3-substituted COT ligand is resolved.

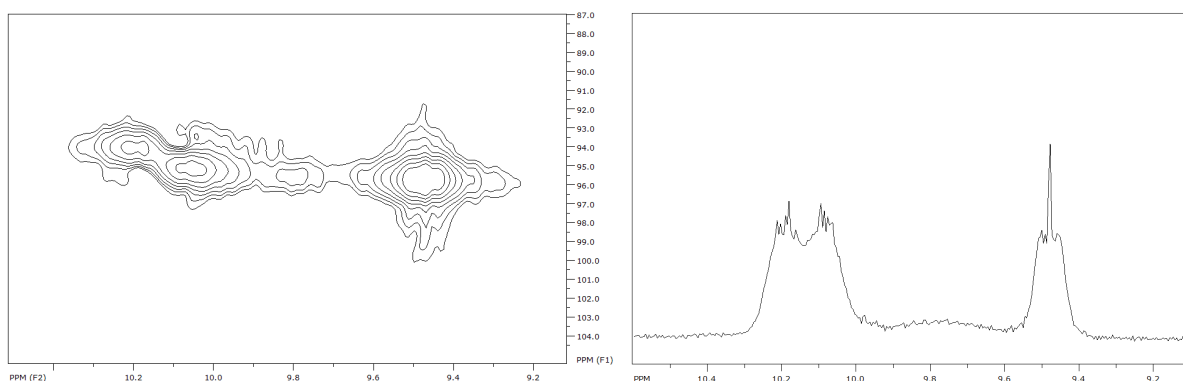

### Crystal structure report

Single crystal analysis of **4** was performed on a Bruker Apex II Quazar diffractometer at 100 K collecting four spheres of data with an irradiation time of 10 to 20 s per frame applying a combination of  $\omega$ - and  $\varphi$ -scans. For more information be referred to table S1.

The measurement was controlled with the APEX II software<sup>11</sup>, integration of the data proceeded with SAINT<sup>11</sup>, the data were corrected for Lorentz- and polarisation effects, and an experimental absorption correction with SADABS was performed<sup>12</sup>. The structures have been solved by direct methods and refined to a minimum R-value with SHELXL-2013 via full-matrix least-squares on  $F^2$ .<sup>13</sup>

The cif-data of the structure of **4** has been deposited at the CCDC, data are available from <https://www.ccdc.cam.ac.uk/> on request<sup>14</sup> referring to the depository number CCDC 1049923.

**Compound:**  $[\text{Pu}\{\eta^8\text{-C}_8\text{H}_6\text{-1,3-(SiMe}_3)_2\}\{\eta^8\text{-C}_8\text{H}_6\text{-1,4-(SiMe}_3)_2\}]$  (**4**)

**Formula sum:**  $\text{C}_{28}\text{H}_{48}\text{PuSi}_4$

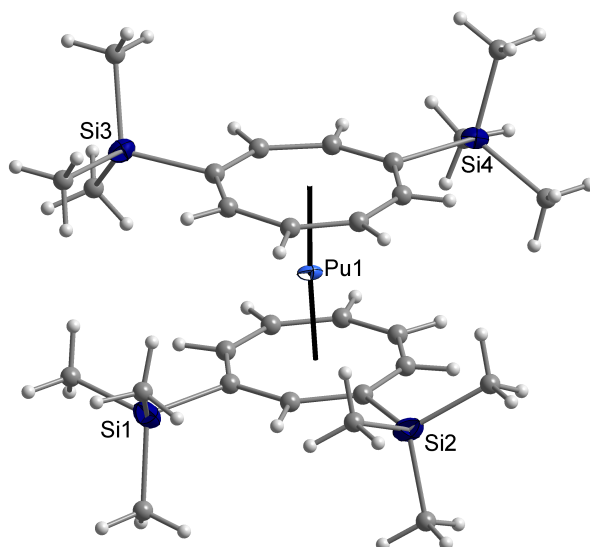

**Figure S3.** Molecular structure of Pu(1,3-COT'')(1,4-COT'') (**4**) in the crystal. Displacement ellipsoids of Pu and Si drawn at the 50% probability level, C and H atoms as spheres of arbitrary size.

**Table S2.** Crystallographic experimental details.*A. Crystal data*

|                                          |                                                   |
|------------------------------------------|---------------------------------------------------|
| formula                                  | C <sub>28</sub> H <sub>48</sub> PuSi <sub>4</sub> |
| formula weight                           | 739.02                                            |
| crystal dimensions (mm)                  | 0.067 x 0.057 x 0.009                             |
| crystal system                           | monoclinic                                        |
| space group                              | <i>P</i> 2 <sub>1</sub> / <i>c</i>                |
| unit cell parameters <sup>a</sup>        |                                                   |
| <i>a</i> (Å)                             | 22.385(5)                                         |
| <i>b</i> (Å)                             | 11.481(3)                                         |
| <i>c</i> (Å)                             | 12.753(3)                                         |
| β (deg)                                  | 102.208(3)                                        |
| <i>V</i> (Å <sup>3</sup> )               | 3204(1)                                           |
| <i>Z</i>                                 | 4                                                 |
| ρ <sub>calcd</sub> (g cm <sup>-3</sup> ) | 1.532                                             |
| μ (mm <sup>-1</sup> )                    | 2.222                                             |

*B. Data collection and structure refinement*

|                                                                                                                                                                                                    |                                                                      |
|----------------------------------------------------------------------------------------------------------------------------------------------------------------------------------------------------|----------------------------------------------------------------------|
| diffractometer                                                                                                                                                                                     | Bruker Apex II Quazar                                                |
| radiation (λ [Å])                                                                                                                                                                                  | graphite-monochromated Mo-K <sub>α</sub> (0.71073)                   |
| temperature (°C)                                                                                                                                                                                   | -170                                                                 |
| scan type                                                                                                                                                                                          | ω and φ scans                                                        |
| completeness of dataset                                                                                                                                                                            | 100%                                                                 |
| data collection θ limit (deg)                                                                                                                                                                      | 24.999                                                               |
| total data collected                                                                                                                                                                               | 19701 (-26 ≤ <i>h</i> ≤ 26, -13 ≤ <i>k</i> ≤ 8, -15 ≤ <i>l</i> ≤ 15) |
| independent reflections                                                                                                                                                                            | 5641 ( <i>R</i> <sub>int</sub> = 0.1476)                             |
| independent reflections with <i>I</i> > 2σ( <i>I</i> )                                                                                                                                             | 3296                                                                 |
| structure solution                                                                                                                                                                                 | heavy atom methods (SHELXS 2013)                                     |
| refinement method                                                                                                                                                                                  | full-matrix least-squares on <i>F</i> <sup>2</sup> (SHELXL 2016/4)   |
| absorption correction method                                                                                                                                                                       | multi-scan                                                           |
| range of transmission factors                                                                                                                                                                      | 0.8654–0.9803                                                        |
| data/restraints/parameters                                                                                                                                                                         | 5641 / 108 / 316                                                     |
| goodness-of-fit ( <i>S</i> ) [all data]                                                                                                                                                            | 0.983                                                                |
| final <i>R</i> indices                                                                                                                                                                             |                                                                      |
| <i>R</i> <sub>1</sub> [all data, <i>I</i> ≥ 2σ( <i>I</i> )]                                                                                                                                        | 0.1373, 0.0640                                                       |
| <i>wR</i> <sub>2</sub> [all data, <i>I</i> ≥ 2σ( <i>I</i> )]                                                                                                                                       | 0.1301, 0.1 <sup>072</sup>                                           |
| largest difference peak and hole                                                                                                                                                                   | 2.516 and -1.883 e Å <sup>-3</sup>                                   |
| Extinction coefficient                                                                                                                                                                             | –                                                                    |
| Flack parameter                                                                                                                                                                                    | –                                                                    |
| Refinement special details: Restraints on the anisotropic displacement parameters of the COT ring C atoms (C1–C16) have been applied (SIMU and ISOR commands in SHELXL, with an ESD of each 0.01). |                                                                      |

**Table S3.** Atomic Coordinates and Equivalent Isotropic Displacement Parameters.

| Atom | x           | y           | z          | $U_{\text{eq}}, \text{\AA}^2$ |
|------|-------------|-------------|------------|-------------------------------|
| PU1  | 0.26867(2)  | 0.09089(4)  | 0.45595(4) | 0.01798(15)                   |
| SI1  | 0.10488(16) | -0.0960(4)  | 0.3352(3)  | 0.0323(9)                     |
| SI2  | 0.31341(18) | -0.2455(4)  | 0.5734(3)  | 0.0332(10)                    |
| SI3  | 0.12051(17) | 0.3419(3)   | 0.4290(3)  | 0.0257(9)                     |
| SI4  | 0.43532(16) | 0.2711(3)   | 0.5596(3)  | 0.0257(9)                     |
| C1   | 0.1872(5)   | -0.0547(11) | 0.3442(9)  | 0.022(3)                      |
| C2   | 0.2295(6)   | -0.1235(11) | 0.4217(10) | 0.025(3)                      |
| C3   | 0.2931(6)   | -0.1343(11) | 0.4615(10) | 0.024(3)                      |
| C4   | 0.3433(5)   | -0.0784(12) | 0.4305(10) | 0.026(3)                      |
| C5   | 0.3525(6)   | 0.0075(11)  | 0.3563(10) | 0.026(3)                      |
| C6   | 0.3140(5)   | 0.0729(11)  | 0.2798(9)  | 0.021(3)                      |
| C7   | 0.2510(5)   | 0.0830(12)  | 0.2447(9)  | 0.024(3)                      |
| C8   | 0.1999(6)   | 0.0330(11)  | 0.2716(10) | 0.024(3)                      |
| C9   | 0.1945(5)   | 0.2662(12)  | 0.4922(9)  | 0.023(3)                      |
| C10  | 0.2453(6)   | 0.3159(12)  | 0.4621(10) | 0.028(3)                      |
| C11  | 0.3098(6)   | 0.3032(11)  | 0.4896(10) | 0.027(3)                      |
| C12  | 0.3538(6)   | 0.2366(12)  | 0.5618(10) | 0.026(3)                      |
| C13  | 0.3455(6)   | 0.1491(12)  | 0.6360(10) | 0.026(3)                      |
| C14  | 0.2952(5)   | 0.0955(13)  | 0.6684(9)  | 0.028(3)                      |
| C15  | 0.2344(6)   | 0.1045(13)  | 0.6383(10) | 0.032(3)                      |
| C16  | 0.1899(5)   | 0.1749(12)  | 0.5670(10) | 0.025(3)                      |
| C17  | 0.0520(6)   | 0.0114(12)  | 0.2548(12) | 0.039(4)                      |
| C18  | 0.0865(6)   | -0.1060(16) | 0.4711(11) | 0.056(5)                      |
| C19  | 0.0916(6)   | -0.2405(12) | 0.2669(12) | 0.048(4)                      |
| C20  | 0.3861(6)   | -0.2094(14) | 0.6662(11) | 0.053(5)                      |
| C21  | 0.3209(7)   | -0.3858(12) | 0.5068(12) | 0.048(4)                      |
| C22  | 0.2531(6)   | -0.2552(14) | 0.6538(11) | 0.048(4)                      |
| C23  | 0.1276(6)   | 0.4990(12)  | 0.4718(11) | 0.038(4)                      |
| C24  | 0.0538(5)   | 0.2800(14)  | 0.4737(10) | 0.038(4)                      |
| C25  | 0.1075(6)   | 0.3359(12)  | 0.2793(10) | 0.030(4)                      |
| C26  | 0.4433(6)   | 0.3226(15)  | 0.4244(11) | 0.046(5)                      |
| C27  | 0.4850(6)   | 0.1398(12)  | 0.5977(12) | 0.044(4)                      |
| C28  | 0.4618(6)   | 0.3886(11)  | 0.6576(10) | 0.030(4)                      |



**Table S4.** Interatomic Distances (Å).

| atom1 | atom2 | distance  |  | atom1 | atom2 | distance  |
|-------|-------|-----------|--|-------|-------|-----------|
| PU1   | C1    | 2.656(11) |  | SI3   | C24   | 1.849(13) |
| PU1   | C2    | 2.618(12) |  | SI3   | C25   | 1.871(12) |
| PU1   | C3    | 2.640(13) |  | SI4   | C12   | 1.873(13) |
| PU1   | C4    | 2.628(13) |  | SI4   | C26   | 1.868(14) |
| PU1   | C5    | 2.658(13) |  | SI4   | C27   | 1.874(14) |
| PU1   | C7    | 2.640(11) |  | SI4   | C28   | 1.850(13) |
| PU1   | C8    | 2.609(12) |  | C1    | C2    | 1.450(16) |
| PU1   | C10   | 2.641(14) |  | C1    | C8    | 1.437(17) |
| PU1   | C11   | 2.608(13) |  | C2    | C3    | 1.410(16) |
| PU1   | C13   | 2.647(11) |  | C3    | C4    | 1.422(17) |
| PU1   | C14   | 2.648(12) |  | C4    | C5    | 1.412(17) |
| PU1   | C15   | 2.604(13) |  | C5    | C6    | 1.380(16) |
| SI1   | C1    | 1.883(12) |  | C6    | C7    | 1.392(15) |
| SI1   | C17   | 1.860(14) |  | C7    | C8    | 1.384(16) |
| SI1   | C18   | 1.867(14) |  | C9    | C10   | 1.396(17) |
| SI1   | C19   | 1.869(15) |  | C9    | C16   | 1.436(17) |
| SI2   | C3    | 1.897(13) |  | C10   | C11   | 1.420(16) |
| SI2   | C20   | 1.846(13) |  | C11   | C12   | 1.422(17) |
| SI2   | C21   | 1.845(14) |  | C12   | C13   | 1.419(18) |
| SI2   | C22   | 1.864(14) |  | C13   | C14   | 1.418(17) |
| SI3   | C9    | 1.893(12) |  | C14   | C15   | 1.338(15) |
| SI3   | C23   | 1.881(13) |  | C15   | C16   | 1.446(17) |

**Table S5.** Selected Interatomic Angles (deg.).

| atom1 | atom2 | atom3 | angle    |  | atom1 | atom2 | atom3 | angle     |
|-------|-------|-------|----------|--|-------|-------|-------|-----------|
| C1    | SI1   | C17   | 111.5(6) |  | C24   | SI3   | C25   | 109.8(6)  |
| C1    | SI1   | C18   | 111.3(6) |  | C12   | SI4   | C26   | 111.4(6)  |
| C1    | SI1   | C19   | 107.9(6) |  | C12   | SI4   | C27   | 110.6(6)  |
| C17   | SI1   | C18   | 108.3(7) |  | C12   | SI4   | C28   | 108.6(6)  |
| C17   | SI1   | C19   | 108.2(7) |  | C26   | SI4   | C27   | 109.1(7)  |
| C18   | SI1   | C19   | 109.5(8) |  | C26   | SI4   | C28   | 108.2(7)  |
| C3    | SI2   | C20   | 111.7(6) |  | C27   | SI4   | C28   | 108.9(6)  |
| C3    | SI2   | C21   | 105.8(6) |  | SI1   | C1    | C2    | 113.2(9)  |
| C3    | SI2   | C22   | 111.6(6) |  | SI1   | C1    | C8    | 117.5(9)  |
| C20   | SI2   | C21   | 109.7(7) |  | C2    | C1    | C8    | 129.1(11) |
| C20   | SI2   | C22   | 107.7(7) |  | C1    | C2    | C3    | 139.2(12) |
| C21   | SI2   | C22   | 110.3(7) |  | SI2   | C3    | C2    | 113.2(10) |
| C9    | SI3   | C23   | 107.7(6) |  | SI2   | C3    | C4    | 115.7(9)  |
| C9    | SI3   | C24   | 112.5(6) |  | C2    | C3    | C4    | 131.1(12) |
| C9    | SI3   | C25   | 110.5(6) |  | C3    | C4    | C5    | 137.5(12) |
| C23   | SI3   | C24   | 107.7(7) |  | C4    | C5    | C6    | 134.1(12) |
| C23   | SI3   | C25   | 108.5(6) |  | C5    | C6    | C7    | 135.5(12) |

**Table S5 (continued).** Selected Interatomic Angles (deg.).

| atom1 | atom2 | atom3 | angle     |  | atom1 | atom2 | atom3 | angle     |
|-------|-------|-------|-----------|--|-------|-------|-------|-----------|
| C6    | C7    | C8    | 136.0(13) |  | Si4   | C12   | C11   | 114.9(10) |
| C1    | C8    | C7    | 137.4(12) |  | Si4   | C12   | C13   | 115.2(9)  |
| Si3   | C9    | C10   | 112.6(10) |  | C11   | C12   | C13   | 129.9(12) |
| Si3   | C9    | C16   | 116.0(9)  |  | C12   | C13   | C14   | 136.5(12) |
| C10   | C9    | C16   | 131.2(12) |  | C13   | C14   | C15   | 134.8(14) |
| C9    | C10   | C11   | 137.3(14) |  | C14   | C15   | C16   | 138.4(14) |
| C10   | C11   | C12   | 138.2(13) |  | C9    | C16   | C15   | 133.6(12) |

**Table S6.** Anisotropic Displacement Parameters ( $U_{ij}$ , Å<sup>2</sup>)

| atom | $U_{11}$  | $U_{22}$  | $U_{33}$  | $U_{23}$   | $U_{13}$    | $U_{12}$    |
|------|-----------|-----------|-----------|------------|-------------|-------------|
| PU1  | 0.0279(2) | 0.0086(2) | 0.0172(2) | -0.0008(3) | 0.00409(16) | -0.0005(3)  |
| Si1  | 0.030(2)  | 0.030(2)  | 0.035(2)  | 0.001(3)   | 0.0027(16)  | -0.009(2)   |
| Si2  | 0.044(2)  | 0.014(2)  | 0.039(3)  | 0.008(2)   | 0.0013(19)  | 0.0017(19)  |
| Si3  | 0.032(2)  | 0.020(2)  | 0.026(2)  | 0.003(2)   | 0.0074(17)  | 0.0042(18)  |
| Si4  | 0.032(2)  | 0.019(2)  | 0.026(2)  | -0.003(2)  | 0.0058(16)  | -0.0029(18) |
| C1   | 0.032(6)  | 0.012(6)  | 0.021(5)  | -0.004(5)  | 0.002(4)    | -0.005(5)   |
| C2   | 0.038(6)  | 0.010(6)  | 0.024(5)  | -0.005(5)  | -0.001(5)   | -0.012(5)   |
| C3   | 0.038(5)  | 0.006(5)  | 0.024(5)  | -0.005(5)  | -0.001(4)   | -0.001(4)   |
| C4   | 0.033(5)  | 0.010(6)  | 0.032(6)  | -0.002(5)  | 0.001(5)    | 0.005(5)    |
| C5   | 0.033(6)  | 0.015(6)  | 0.033(6)  | -0.003(5)  | 0.013(5)    | -0.003(5)   |
| C6   | 0.035(5)  | 0.007(6)  | 0.026(5)  | -0.006(5)  | 0.016(4)    | -0.006(5)   |
| C7   | 0.040(6)  | 0.014(6)  | 0.020(5)  | -0.005(6)  | 0.008(4)    | -0.006(5)   |
| C8   | 0.035(6)  | 0.013(6)  | 0.024(5)  | -0.004(5)  | 0.009(5)    | -0.004(5)   |
| C9   | 0.024(5)  | 0.023(6)  | 0.021(5)  | -0.006(5)  | 0.006(5)    | -0.002(5)   |
| C10  | 0.036(6)  | 0.021(6)  | 0.026(6)  | -0.008(5)  | 0.006(5)    | 0.005(5)    |
| C11  | 0.041(6)  | 0.012(6)  | 0.029(6)  | -0.011(5)  | 0.007(5)    | -0.005(5)   |
| C12  | 0.037(6)  | 0.013(6)  | 0.025(6)  | -0.014(5)  | 0.001(5)    | 0.002(5)    |
| C13  | 0.032(6)  | 0.018(6)  | 0.022(6)  | -0.011(5)  | -0.007(5)   | 0.002(5)    |
| C14  | 0.029(5)  | 0.031(6)  | 0.020(5)  | -0.009(6)  | -0.001(4)   | -0.001(6)   |
| C15  | 0.028(5)  | 0.034(7)  | 0.030(6)  | -0.011(6)  | -0.003(5)   | -0.011(6)   |
| C16  | 0.024(5)  | 0.025(6)  | 0.026(6)  | -0.009(5)  | 0.007(5)    | -0.011(5)   |
| C17  | 0.031(8)  | 0.029(10) | 0.059(10) | -0.003(9)  | 0.009(7)    | -0.004(7)   |
| C18  | 0.046(9)  | 0.072(14) | 0.053(10) | 0.003(11)  | 0.019(7)    | -0.010(10)  |
| C19  | 0.046(10) | 0.022(10) | 0.077(12) | 0.009(10)  | 0.011(8)    | -0.007(8)   |
| C20  | 0.049(10) | 0.052(12) | 0.049(10) | 0.024(10)  | -0.014(8)   | 0.007(9)    |
| C21  | 0.077(10) | 0.013(9)  | 0.055(9)  | 0.005(8)   | 0.013(8)    | -0.003(7)   |
| C22  | 0.067(11) | 0.029(10) | 0.043(10) | 0.026(9)   | 0.004(8)    | -0.005(8)   |
| C23  | 0.055(10) | 0.024(9)  | 0.028(8)  | -0.016(8)  | -0.004(7)   | 0.014(7)    |
| C24  | 0.028(8)  | 0.055(11) | 0.030(8)  | -0.001(8)  | 0.008(6)    | -0.001(8)   |
| C25  | 0.037(8)  | 0.024(9)  | 0.030(8)  | 0.011(8)   | 0.008(6)    | 0.004(7)    |
| C26  | 0.021(8)  | 0.067(13) | 0.050(10) | -0.001(10) | 0.008(7)    | -0.001(8)   |
| C27  | 0.038(9)  | 0.033(10) | 0.058(11) | -0.016(9)  | 0.003(7)    | 0.006(7)    |
| C28  | 0.034(8)  | 0.012(9)  | 0.042(8)  | 0.002(7)   | 0.000(6)    | 0.006(6)    |

**Table S7.** Derived Atomic Coordinates and Displacement Parameters for Hydrogen Atoms.

| Atom | x        | y         | z        | $U_{eq}, \text{\AA}^2$ |
|------|----------|-----------|----------|------------------------|
| H2   | 0.207959 | -0.177622 | 0.456126 | 0.030                  |
| H4   | 0.381147 | -0.106662 | 0.470906 | 0.031                  |
| H5   | 0.394503 | 0.023973  | 0.359843 | 0.031                  |
| H6   | 0.335713 | 0.123174  | 0.241960 | 0.026                  |
| H7   | 0.240271 | 0.137863  | 0.188082 | 0.029                  |
| H8   | 0.163304 | 0.065746  | 0.230954 | 0.029                  |
| H10  | 0.233438 | 0.374139  | 0.408791 | 0.034                  |
| H11  | 0.329035 | 0.353506  | 0.447676 | 0.033                  |
| H13  | 0.383360 | 0.118441  | 0.673767 | 0.031                  |
| H14  | 0.307568 | 0.040368  | 0.724330 | 0.033                  |
| H15  | 0.214773 | 0.048438  | 0.674311 | 0.038                  |
| H16  | 0.148881 | 0.156954  | 0.570307 | 0.030                  |
| H17A | 0.058298 | 0.012486  | 0.181081 | 0.047                  |
| H17B | 0.060175 | 0.089039  | 0.286595 | 0.047                  |
| H17C | 0.009658 | -0.010653 | 0.254404 | 0.047                  |
| H18A | 0.042460 | -0.117400 | 0.463744 | 0.067                  |
| H18B | 0.099022 | -0.033934 | 0.510889 | 0.067                  |
| H18C | 0.108528 | -0.172056 | 0.510132 | 0.067                  |
| H19A | 0.049779 | -0.266375 | 0.265623 | 0.058                  |
| H19B | 0.120606 | -0.297518 | 0.305902 | 0.058                  |
| H19C | 0.097594 | -0.233392 | 0.193171 | 0.058                  |
| H20A | 0.393986 | -0.265954 | 0.725101 | 0.064                  |
| H20B | 0.383505 | -0.131030 | 0.695353 | 0.064                  |
| H20C | 0.419553 | -0.212068 | 0.627496 | 0.064                  |
| H21A | 0.355432 | -0.381963 | 0.470851 | 0.058                  |
| H21B | 0.283242 | -0.401725 | 0.453634 | 0.058                  |
| H21C | 0.327866 | -0.448181 | 0.560402 | 0.058                  |
| H22A | 0.264261 | -0.315234 | 0.709094 | 0.057                  |
| H22B | 0.213977 | -0.275670 | 0.606549 | 0.057                  |
| H22C | 0.249218 | -0.179933 | 0.687915 | 0.057                  |
| H23A | 0.091140 | 0.541733  | 0.435728 | 0.045                  |
| H23B | 0.163889 | 0.533078  | 0.452293 | 0.045                  |
| H23C | 0.131495 | 0.503892  | 0.549668 | 0.045                  |
| H24A | 0.016774 | 0.322218  | 0.439197 | 0.045                  |
| H24B | 0.059777 | 0.287503  | 0.551737 | 0.045                  |
| H24C | 0.049460 | 0.197551  | 0.453696 | 0.045                  |
| H25A | 0.133695 | 0.275653  | 0.258235 | 0.036                  |
| H25B | 0.117543 | 0.411598  | 0.251925 | 0.036                  |
| H25C | 0.064589 | 0.317342  | 0.249387 | 0.036                  |
| H26A | 0.422893 | 0.398132  | 0.409020 | 0.055                  |
| H26B | 0.424468 | 0.265946  | 0.369888 | 0.055                  |
| H26C | 0.486733 | 0.330922  | 0.423233 | 0.055                  |
| H27A | 0.527419 | 0.159625  | 0.596671 | 0.053                  |
| H27B | 0.471102 | 0.076852  | 0.546466 | 0.053                  |

**Table S7 (continued).** Derived Atomic Coordinates and Displacement Parameters for Hydrogen Atoms.

| Atom | x        | y        | z        | $U_{eq}, \text{\AA}^2$ |
|------|----------|----------|----------|------------------------|
| H27C | 0.482338 | 0.114336 | 0.669954 | 0.053                  |
| H28A | 0.434741 | 0.456157 | 0.640695 | 0.037                  |
| H28B | 0.503588 | 0.411098 | 0.654001 | 0.037                  |
| H28C | 0.461234 | 0.360895 | 0.730064 | 0.037                  |

### Computational study details

In view of the low point symmetry and the considerable dimension of the Pu(1,3-COT'')(1,4-COT'') molecule, compromises in the selection of basis sets and the chosen methods had to be made. Thus, second order Møller-Plesset perturbation theory (MP2), covering significant parts of dynamic electron correlation, in combination with restricted open shell Hartree Fock (ROHF) single reference calculations were considered most appropriate for geometry optimizations of Pu(1,3-COT'')(1,4-COT'') (**4**). MP2 energies and gradients were obtained with Z-averaged perturbation theory (ZAPT)<sup>3,4</sup> available in the GAMESS (US) code.<sup>5</sup> In addition, effective core potentials (ECP) were used for the elements plutonium and silicon in combination with LANL2DZ basis sets (Los Alamos National Laboratory 2 double  $\zeta$ ) for all elements.<sup>6-8</sup> The effective core potentials replace 118 of 366 electrons. At the same time relativistic effects predominantly affecting the core shells of plutonium are considered in a scalar relativistic approximation within the ECPs. As has been found for plutocene,<sup>9</sup> spin-orbit coupling is not expected to have large influence on the equilibrium geometry of Pu(1,3-COT'')(1,4-COT''). The carbon basis set was augmented with additional polarization and diffuse functions, denoted LANL2DZ(d,p) in the following. On the MP2 level this modification significantly improved the plutonium carbon bond length in geometry optimizations of the symmetric plutocene molecule, as can be seen in Table S7. For Pu(1,3-COT'')(1,4-COT'') (**4**), the ground state was assumed to have the same multiplicity as plutocene with ground state  $^5A_g$ .<sup>9,10</sup>

**Table S8:** Structural parameters of plutonocene ( $\text{Pu}(\text{COT})_2$ ) derived from quantum chemical calculations using a modified LANL2DZ basis and effective core potentials, in comparison with high level *ab initio* results from refs. (7) and (8). The dihedral angle CCH smaller than  $180^\circ$  indicates a bending of the C-H bond towards the Pu atom (see Fig. 1).

| Method                 | Pu-COT (pm) | C-C (Å) | C-H (Å) | CCH (deg.) |
|------------------------|-------------|---------|---------|------------|
| ROHF/LANL2DZ/ECP       | 201.9       | 1.416   | 1.072   | 176.1      |
| ROHF/ LANL2DZ(d,p)/ECP | 194.5       | 1.409   | 1.075   | 174.4      |
| MP2 LANL2DZ(d,p)/ECP   | 188.7       | 1.423   | 1.091   | 173.2      |
| CASPT2 <sup>7,8</sup>  | 189.8       | 1.404   | 1.087   | 180.0      |

**Figure S4:** Structure of plutonocene ( $\text{Pu}(\text{COT})_2$ ), optimized in quantum chemical calculations on the MP2/LANL2DZ(d,p) level.

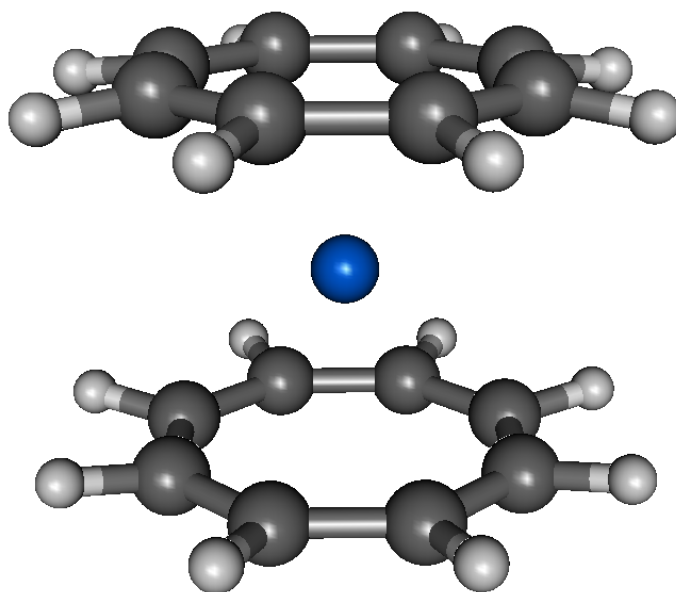

**Table S9:** Bond lengths (Å) from *ab initio* geometry optimizations of the Pu(1,3-COT'')(1,4-COT'') molecule in comparison with experimental data. For the labeling of the atoms see Fig. S3. Ring(1,3) is the COT'' ring with the SiMe<sub>3</sub> groups positioned at carbons C(1) and C(3).

| Bond                           | ROHF/LANL2DZ(d,p) / ECP | MP2/LANL2DZ(d,p) / ECP | Crystal Structure |
|--------------------------------|-------------------------|------------------------|-------------------|
| Ring centroids                 |                         |                        |                   |
| Ring(9,12)-Pu                  | 1.981                   | 1.842                  | 1.904             |
| Ring(1,3)-Pu                   | 1.978                   | 1.842                  | 1.889             |
| Centroid-Pu-Centroid angle (°) | 1.779                   | 1.772                  | 1.766             |
|                                |                         |                        |                   |
| Ring(1,3)                      |                         |                        |                   |
| C(1)-C(2)                      | 1.425                   | 1.431                  | 1.450(16)         |
| C(2)-C(3)                      | 1.411                   | 1.428                  | 1.410(16)         |
| C(3)-C(4)                      | 1.423                   | 1.427                  | 1.422(17)         |
| C(4)-C(5)                      | 1.407                   | 1.413                  | 1.412(17)         |
| C(5)-C(6)                      | 1.400                   | 1.418                  | 1.380(16)         |
| C(6)-C(7)                      | 1.412                   | 1.420                  | 1.392(15)         |
| C(7)-C(8)                      | 1.402                   | 1.421                  | 1.384(16)         |
| C(8)-C(1)                      | 1.417                   | 1.426                  | 1.437(17)         |
|                                |                         |                        |                   |
| Ring (9,12)                    |                         |                        |                   |
| C(9)-C(10)                     | 1.425                   | 1.429                  | 1.396(17)         |
| C(10)-C(11)                    | 1.405                   | 1.422                  | 1.420(16)         |
| C(11)-C(12)                    | 1.417                   | 1.427                  | 1.422(17)         |
| C(12)-C(13)                    | 1.422                   | 1.428                  | 1.419(18)         |
| C(13)-C(14)                    | 1.399                   | 1.421                  | 1.418(17)         |
| C(14)-C(15)                    | 1.413                   | 1.419                  | 1.338(15)         |
| C(15)-C(16)                    | 1.407                   | 1.422                  | 1.446(17)         |
| C(16)-C(9)                     | 1.409                   | 1.426                  | 1.436(17)         |
|                                |                         |                        |                   |
| Ring-Si                        |                         |                        |                   |
| Si(1)-C(1)                     | 1.915                   | 1.906                  | 1.883(12)         |
| Si(2)-C(3)                     | 1.917                   | 1.905                  | 1.897(13)         |
| Si(3)-C(9)                     | 1.913                   | 1.908                  | 1.893(12)         |
| Si(4)-C(12)                    | 1.912                   | 1.907                  | 1.873(13)         |
|                                |                         |                        |                   |
| Si-Methyl                      |                         |                        |                   |
| Si(1)-C(17)                    | 1.899                   | 1.895                  | 1.860(14)         |
| Si(1)-C(18)                    | 1.896                   | 1.893                  | 1.867(14)         |
| Si(1)-C(19)                    | 1.898                   | 1.897                  | 1.869(15)         |
| Si(2)-C(20)                    | 1.898                   | 1.894                  | 1.846(13)         |
| Si(2)-C(21)                    | 1.896                   | 1.897                  | 1.845(14)         |
| Si(2)-C(22)                    | 1.897                   | 1.896                  | 1.864(14)         |

**Table S9 (continued):** Bond lengths (Å) from *ab initio* geometry optimizations of the Pu(1,3-COT'')(1,4-COT'') molecule in comparison with experimental data. For the labeling of the atoms see Fig. S3.

| Bond        | ROHF/LANL2DZ(d,p) / ECP | MP2/LANL2DZ(d,p) / ECP | Crystal Structure |
|-------------|-------------------------|------------------------|-------------------|
| Si(3)-C(23) | 1.897                   | 1.897                  | 1.881(13)         |
| Si(3)-C(24) | 1.896                   | 1.893                  | 1.849(13)         |
| Si(3)-C(25) | 1.897                   | 1.896                  | 1.871(12)         |
| Si(4)-C(26) | 1.898                   | 1.896                  | 1.868(14)         |
| Si(4)-C(27) | 1.898                   | 1.895                  | 1.874(14)         |
| Si(4)-C(28) | 1.897                   | 1.899                  | 1.850(13)         |

**Figure S5.** Structure of Pu(1,3-COT'')(1,4-COT'') (4) from MP2/LANL2DZ(d,p) geometry optimizations. The black dots linked by red dashed lines with the central Pu atom mark the positions of the ring centroids.

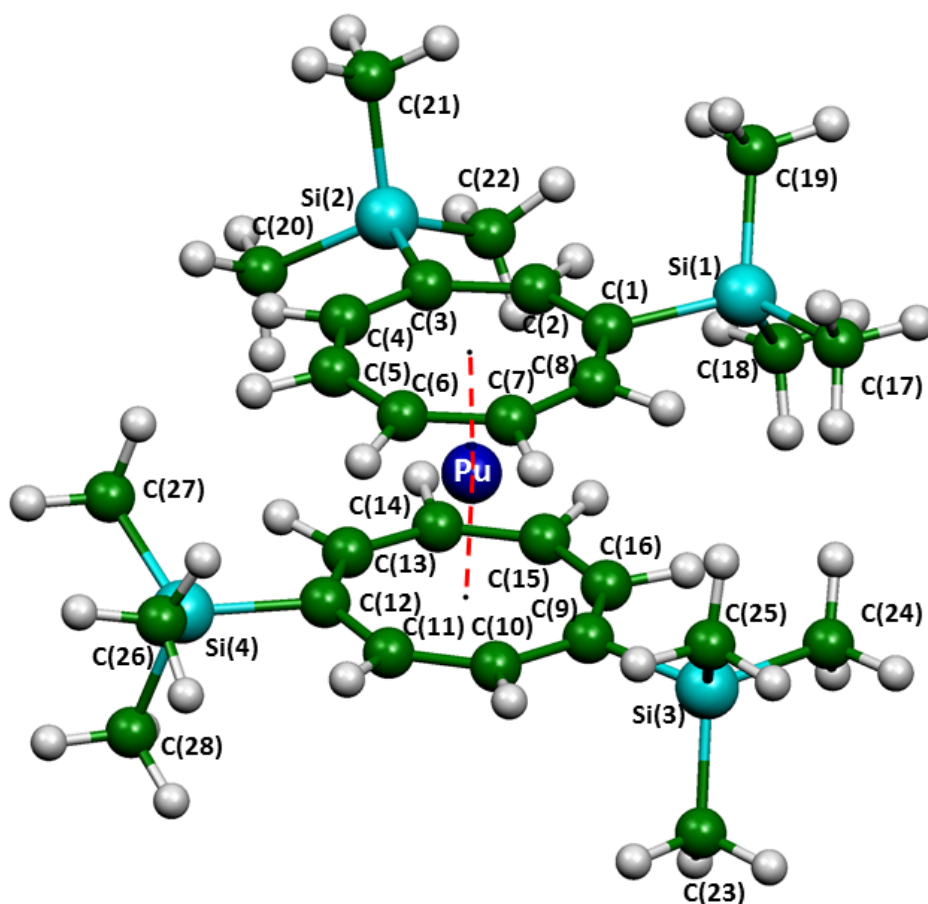

**Figure S6a–d.** Molecule orbital diagrams of  $\text{An}(1,3\text{-COT}''')(1,4\text{-COT}'')$  and  $\text{An}(1,4\text{-COT}'')_2$  complexes (An = U, Pu).

**a)** The geometry equivalent to the crystal structure of  $\text{Pu}(1,3\text{-COT}''')(1,4\text{-COT}'')$  (**4**).

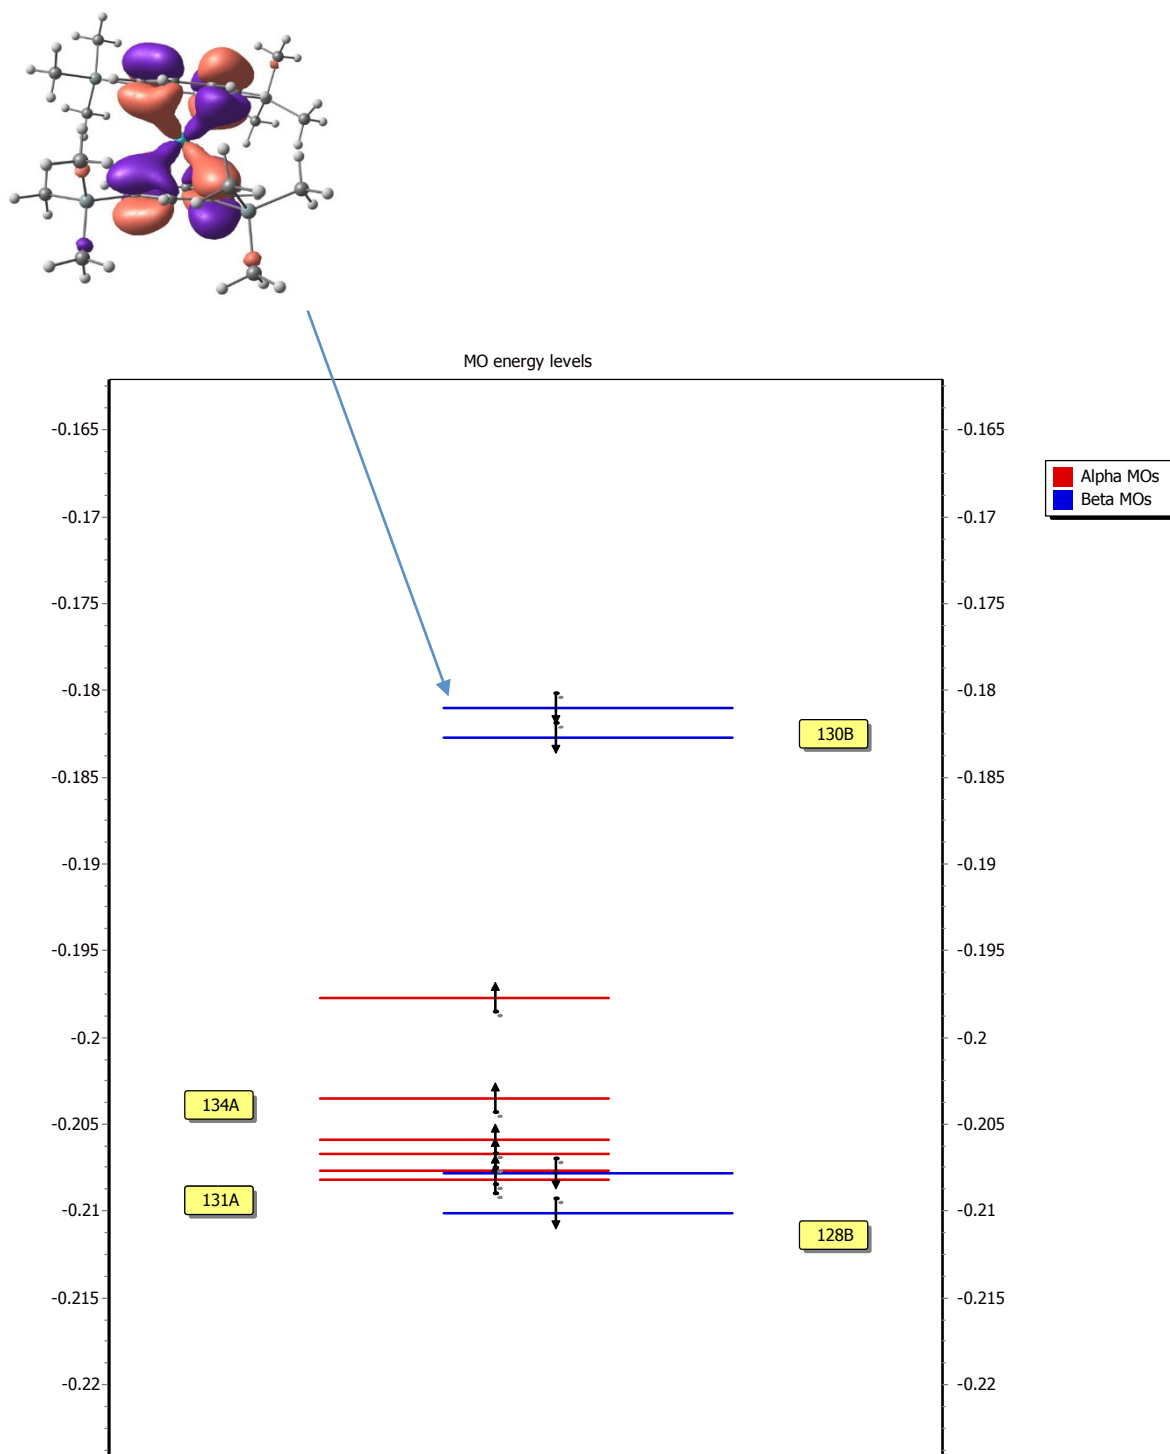



**b)** The geometry equivalent of hypothetical  $\text{Pu}(1,4\text{-COT}^{\text{II}})_2$  to the uranocene analogue from (15).

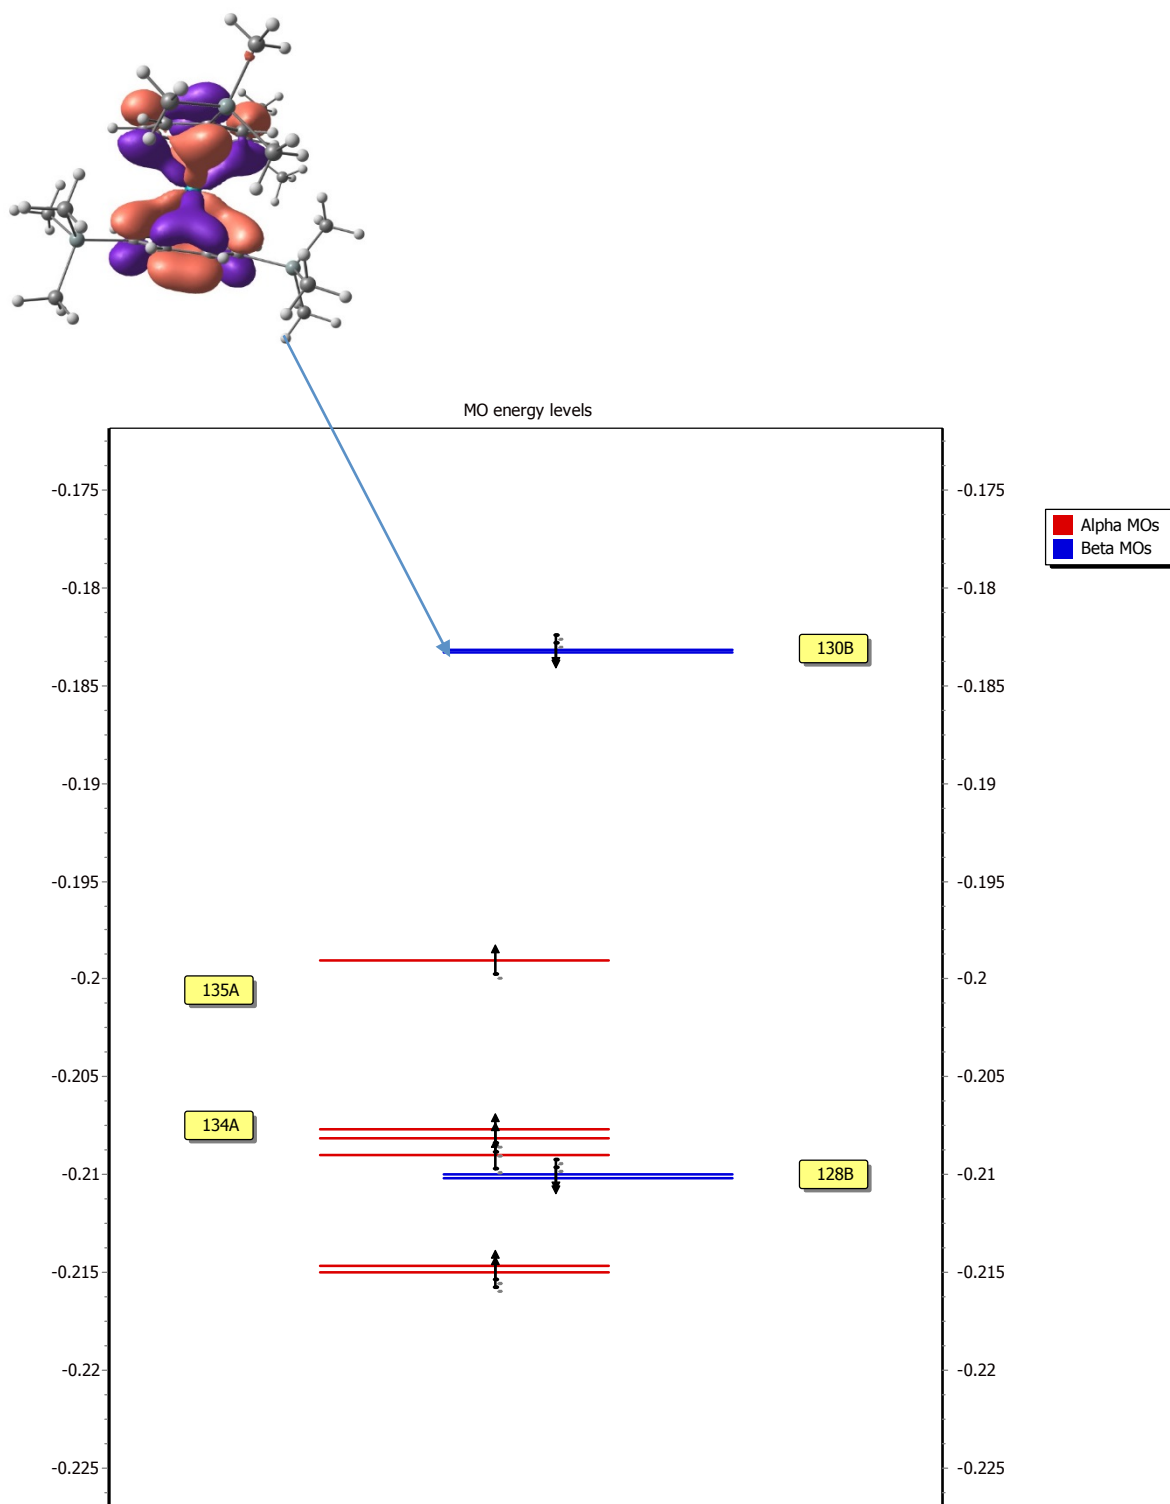

c) The geometry equivalent of hypothetical U(1,3-COT<sup>2+</sup>)(1,4-COT<sup>2+</sup>) to the plutocene analogue 4.

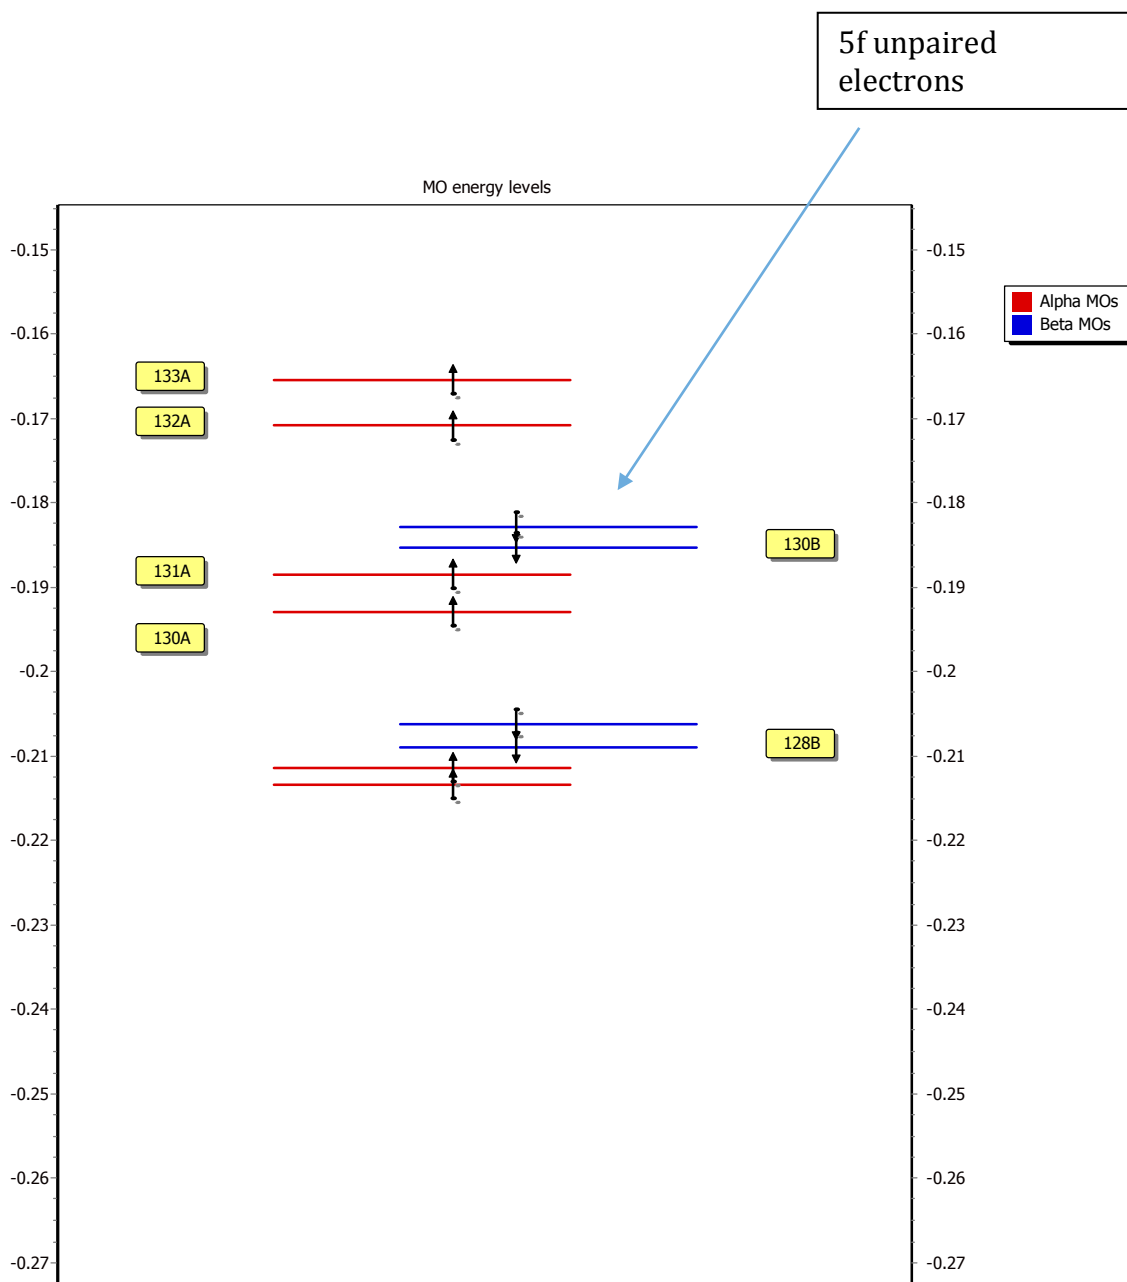

d) The geometry equivalent to the crystal structure of  $U(1,4-COT'')_2$  from (15).

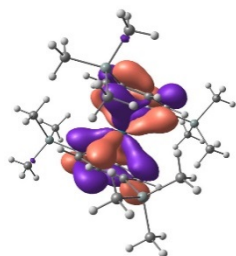

5f unpaired electrons

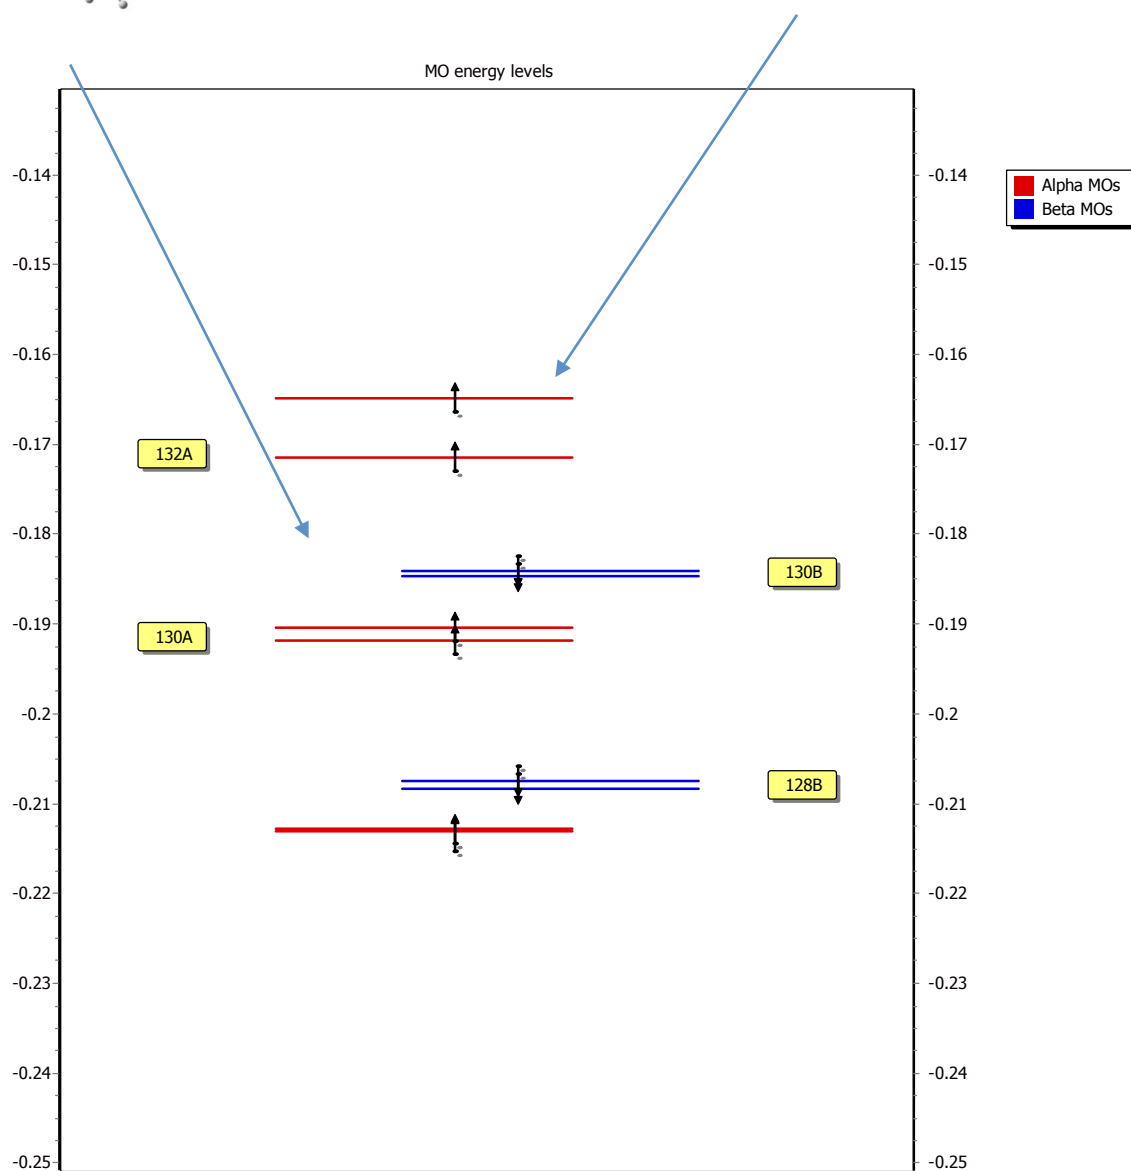

## References

- (1) F. Baumgärtner, E. O. Fischer, B. Kanellakopoulos, P. Laubereau, *Angew. Chem.* **1965**, *77*, 866-867.
- (2) David L. Clark, Siegfried S. Hecker, Gordon D. Jarvinen, and Mary P. Neu in *The Chemistry of the Actinide and Transactinide Elements*, 4<sup>th</sup> edition, (Eds: L. R. Morss, N. M. Edelstein, J. Fuger), Springer Netherlands, **2010**, 1092.
- (3) Lee, T. J.; Jayatilaka, D. *Chem. Phys. Lett.* **1993**, *201*, 1.
- (4) Lee, T. J.; Rendell, A. P.; Dyall, K. G.; Jayatilaka, D. *J. Chem. Phys.* **1994**, *100*, 7400.
- (5) Schmidt, M. W., Baldrige, K. K.; Boatz, J. A.; Elbert, S. T.; Gordon, M. S.; Jensen, J. H.; Koseki, S.; Matsunaga, N.; Nguyen, K. A.; Su, S. J.; Windus, T. L.; Dupuis, M.; Montgomery, J. A. *J. Comput. Chem.* **1993**, *14*, 1347.
- (6) Hay, P. J.; Wadt, W. R. *J. Chem. Phys.* **1985**, *82*, 270.
- (7) Hay, P. J.; Martin, R. L. *J. Chem. Phys.* **1998**, *109*, 3875.
- (8) The basis sets and ECPs were taken from EMSL basis set exchange library (<https://bse.pnl.gov/bse/portal>).
- (9) Kerridge, A.; Kaltsoyannis, N. *J. Phys. Chem. A* **2009**, *113*, 8737.
- (10) Kerridge, A. *Dalton Trans.* **2013**, *42*, 16428.
- (11) Bruker. APEXII, SAINT, Bruker AXS Inc., Madison, Wisconsin, USA, 2012.
- (12) G. M. Sheldrick, SADABS, University of Göttingen, Germany, 1996.
- (13) G. M. Sheldrick, *Acta Cryst.*, 2015, *C71*, 3-8.
- (14) The Cambridge Structural Database (CSD). <https://www.ccdc.cam.ac.uk/>
- (15) Le Roy, J. J.; Gorelsky, S. I.; Korobkov, I.; Murugesu, M. *Organometallics* **2015**, *34*, 1415–1418.
